# Supplementary material
Source: PubMed Central journal article supplement (PMC4178701)
Supplement: AEM.01465-14_zam999105680so1.pdf [file AEM.01465-14_zam999105680so1.pdf]

Supplemental information belonging to:

Sialylation of Galactosyl-lactoses Using *Trypanosoma cruzi* Trans-Sialidase as Biocatalyst  
and Bovine  $\kappa$ -Casein-Derived Glycomacropeptide as Donor Substrate

Maarten H. Wilbrink,<sup>a</sup> Geert A. ten Kate,<sup>a</sup> Sander S. van Leeuwen,<sup>a</sup> Peter Sanders,<sup>a</sup> Erik Sallomons,<sup>b</sup>  
Johannes A. Hage,<sup>c</sup> Lubbert Dijkhuizen,<sup>a</sup> Johannis P. Kamerling<sup>a</sup>

*Microbial Physiology, Groningen Biomolecular Sciences and Biotechnology Institute, University of  
Groningen, Groningen, The Netherlands<sup>a</sup>; Royal FrieslandCampina Innovation Center, Wageningen, The  
Netherlands<sup>b</sup>; Darlingii, Son, The Netherlands<sup>c</sup>*

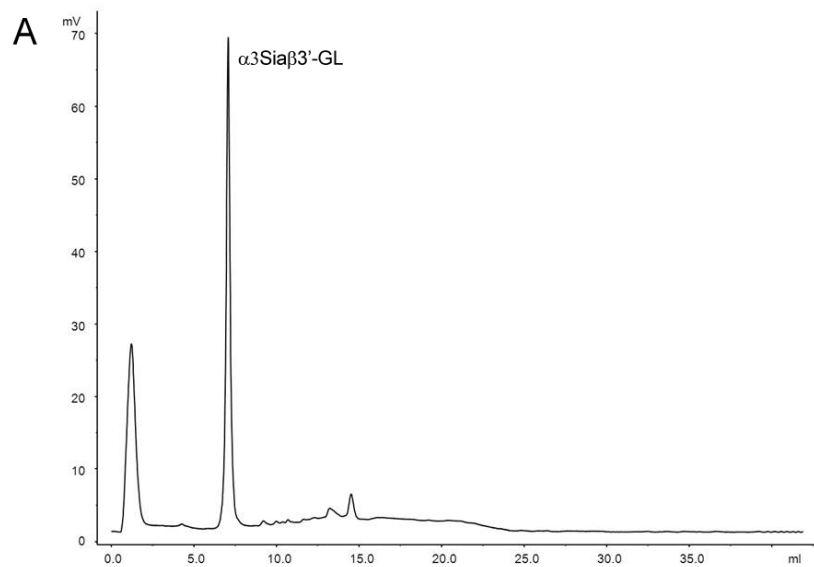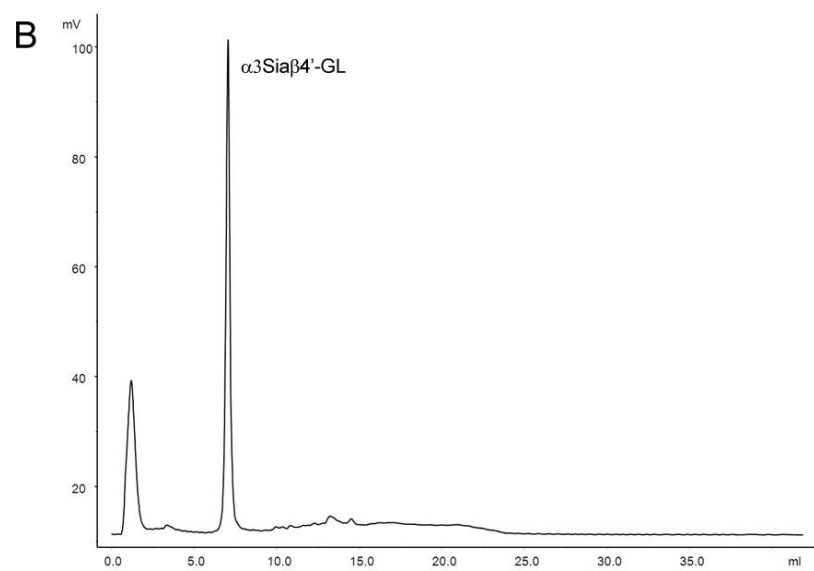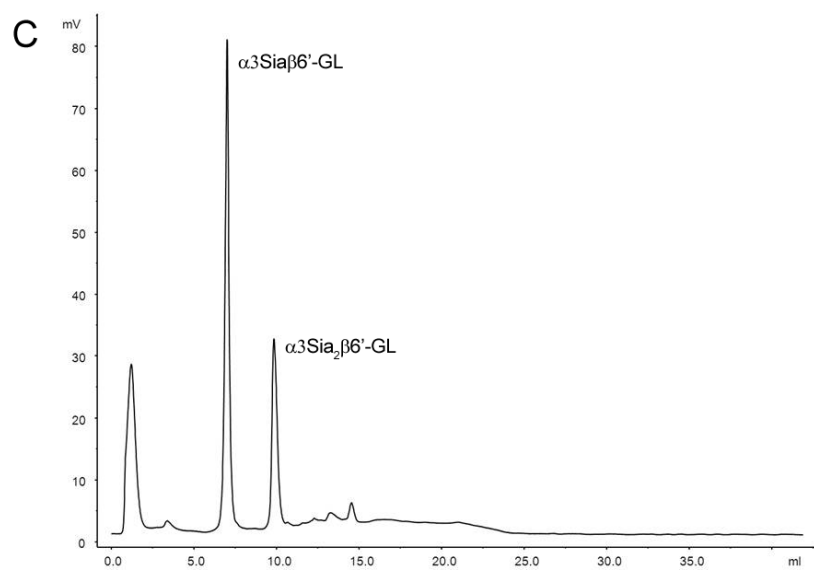

FIG. S1. Anion-exchange chromatograms on Resource Q of TcTS-catalyzed incubations of (A)  $\beta 3'\text{-GL}$ , yielding  $\alpha 3\text{Sia}\beta 3'\text{-GL}$ , (B)  $\beta 4'\text{-GL}$ , yielding  $\alpha 3\text{Sia}\beta 4'\text{-GL}$ , and (C)  $\beta 6'\text{-GL}$ , yielding  $\alpha 3\text{Sia}\beta 6'\text{-GL}$  and  $\alpha 3\text{Sia}_2\beta 6'\text{-GL}$ , using GMP as sialic acid donor (24 h, 25°C, pH 5.0; UV detection).

## NMR analysis of sialylated 3'-galactosyl-lactose ( $\beta$ 3'-GL), 4'-galactosyl-lactose ( $\beta$ 4'-GL), and 6'-galactosyl-lactose ( $\beta$ 6'-GL).

In the following discussion of the NMR data, the sequence of each GL is represented by **C-B-A** with **C** as terminal Gal unit, **B** as internal Gal unit, and **A** as reducing Glc unit; **D** stands for Neu5Ac( $\alpha$ 2-3). The  $^1\text{H}$  NMR spectra of the acceptor substrates  $\beta$ 3'-GL,  $\beta$ 4'-GL, and  $\beta$ 6'-GL are included in Figs. S2, S3, and S4, respectively.

The  $^1\text{H}$  NMR spectrum of mono-sialylated  $\beta$ 3'-GL (Fig. S2, Table 1, MALDI-TOF-MS:  $[\text{M-H}]^-$   $m/z$  795.26) showed anomeric signals at  $\delta$  5.223 (**A $\alpha$**  H-1),  $\delta$  4.664 (**A $\beta$**  H-1),  $\delta$  4.513 (**B** H-1), and  $\delta$  4.689 (**C** H-1). The **D** H-3a and H-3e signals at  $\delta$  1.802 and  $\delta$  2.764, respectively, are indicative of a Neu5Ac( $\alpha$ 2-3) residue (1). The  $^1\text{H}$  NMR spectrum is identical to that earlier reported for Neu5Ac( $\alpha$ 2-3)Gal( $\beta$ 1-3)Gal( $\beta$ 1-4)Glc ( $\alpha$ 3Sia $\beta$ 3'-GL) (2).

In the  $^1\text{H}$  NMR spectrum of mono-sialylated  $\beta$ 4'-GL (Fig. S3, Table 1, MALDI-TOF-MS:  $[\text{M-H}]^-$   $m/z$  795.26) anomeric signals are observed at  $\delta$  5.220 (**A $\alpha$**  H-1),  $\delta$  4.663 (**A $\beta$**  H-1),  $\delta$  4.473 (**B** H-1), and  $\delta$  4.660 (**C** H-1). The Neu5Ac( $\alpha$ 2-3) residue is reflected by the **D** H-3a and H-3e signals at  $\delta$  1.796 and  $\delta$  2.762, respectively (1). Going from  $\beta$ 4'-GL to mono-sialylated  $\beta$ 4'-GL (Fig. S3), the sialylation of O-3 of the terminal Gal residue in  $\beta$ 4'-GL is evident from the strong downfield shift of **C** H-3 ( $\delta$  3.66  $\rightarrow$   $\delta$  4.107). Summarizing the analytical data, the structure of mono-sialylated  $\beta$ 4'-GL is Neu5Ac( $\alpha$ 2-3)Gal( $\beta$ 1-4)Gal( $\beta$ 1-4)Glc ( $\alpha$ 3Sia $\beta$ 4'-GL).

The  $^1\text{H}$  NMR spectrum of mono-sialylated  $\beta$ 6'-GLa (Fig. S4B, Table S1, MALDI-TOF-MS:  $[\text{M-H}]^-$   $m/z$  795.26) showed anomeric signals at  $\delta$  5.217 (**A $\alpha$**  H-1),  $\delta$  4.662 (**A $\beta$**  H-1),  $\delta$  4.535 (**B** H-1), and  $\delta$  4.470 (**C** H-1). The Neu5Ac H-3a and H-3e signals at  $\delta$  1.810 and  $\delta$  2.756, respectively, confirmed the presence of a Neu5Ac( $\alpha$ 2-3) residue (1). Using two-dimensional  $^1\text{H}$ - $^1\text{H}$  COSY,  $^1\text{H}$ - $^1\text{H}$  TOCSY, and  $^1\text{H}$ - $^1\text{H}$  ROESY spectra, in combination with two-dimensional  $^{13}\text{C}$ - $^1\text{H}$  HSQC spectra (data not shown), all  $^1\text{H}$  and  $^{13}\text{C}$  chemical shifts could be assigned (Table S1). Similar to residue **A** in  $\beta$ 6'-GL (Table S1), residue **A** showed a  $\delta$ -value pattern fitting with a 4-substituted Glc residue, i.e. **A $\alpha$**  H-4 at  $\delta$  3.64, **A $\beta$**  H-4 at  $\delta$  3.65, **A $\alpha$**  and **A $\beta$**  C-4 at  $\delta$  80.0. Residue **B** turned out to be a di-substituted Gal( $\beta$ 1-4) residue. An O-6 substitution is indicated by clear downfield shifts of both  $^1\text{H}$  and  $^{13}\text{C}$   $\delta$ -values, i.e. **B** H-6a at  $\delta$  4.037, **B** H-6b at  $\delta$  3.92, and **B** C-6 at  $\delta$  70.1 (compare with residues **B** and **C** in  $\beta$ 6'-GL) (3). An O-3 substitution is reflected by the downfield chemical shift values of **B** H-3 at  $\delta$  4.125 and **B** C-3 at  $\delta$  76.3 (compare with **B** H-3 at  $\delta$  3.66 and **B** C-3 at  $\delta$  73.8 in  $\beta$ 6'-GL), combined with slight upfield shifts for **B** C-2 and **B** C-4 (compare with **B** C-2 and **B** C-4 in  $\beta$ 6'-GL) (3) (Table S1). Residue **C** shows the  $\delta$ -value pattern fitting a terminal Gal( $\beta$ 1-6) residue. The ROESY

spectrum showed cross-peaks between **C** H-1 and **B** H-6a,6b and between **B** H-1 and **A** H-4, supporting the **C1-6B1-4A** sequence. In view of the results, the Neu5Ac residue should be located at O-3 of residue **B**. Summarizing the NMR and MS data, the structure of mono-sialylated  $\beta 6'$ -GLa is Gal( $\beta 1-6$ )[Neu5Ac( $\alpha 2-3$ )]Gal( $\beta 1-4$ )Glc ( $\alpha 3$ Sia $\beta 6'$ -GLa).

In the  $^1\text{H}$  NMR spectrum of mono-sialylated  $\beta 6'$ -GLb (Fig. S4C, Table S1, MALDI-TOF-MS:  $[\text{M-H}]^-$   $m/z$  795.26) anomeric signals are detected at  $\delta$  5.228 (**A $\alpha$**  H-1),  $\delta$  4.660 (**A $\beta$**  H-1),  $\delta$  4.528 (**C** H-1), and  $\delta$  4.462 (**B** H-1). The Neu5Ac H-3a and H-3e signals at  $\delta$  1.815 and  $\delta$  2.755, respectively, confirmed the presence of a Neu5Ac( $\alpha 2-3$ ) residue (1). Using two-dimensional NMR spectroscopy as carried out for  $\alpha 3$ Sia $\beta 6'$ -GLa, all  $^1\text{H}$  and  $^{13}\text{C}$  chemical shifts could be assigned (Table S1). Residue **A** showed for both the  $\alpha$ - and  $\beta$ -anomeric configuration a similar  $\delta$ -value pattern as found for  $\alpha 3$ Sia $\beta 6'$ -GLa, indicating a 4-substituted reducing Glc residue. Internal residue **B** was found to be a 6-O-substituted Gal( $\beta 1-4$ ) residue with significant downfield shifts of **B** H-6a at  $\delta$  4.073 and **B** C-6 at  $\delta$  69.8 (compare with residues **B** and **C** in  $\beta 6'$ -GL) (3). Residue **C** showed evidence for an O-3 substitution as revealed by the downfield shifts of **C** H-3 at  $\delta$  4.100 and **C** C-3 at  $\delta$  76.8 (compare with **C** H-3 at  $\delta$  3.67 and **C** C-3 at  $\delta$  73.8 in  $\beta 6'$ -GL), combined with slight upfield shifts for **C** C-2 and **C** C-4 (compare with **C** C-2 and **C** C-4 in  $\beta 6'$ -GL) (3). In the ROESY spectrum cross-peaks are detected between **C** H-1 and **B** H-6a,6b and between **B** H-1 and **A** H-4, supporting the **C1-6B1-4A** sequence. In view of the results, the Neu5Ac residue should be located at O-3 of residue **C**. Summarizing the NMR and MS data, the structure of mono-sialylated  $\beta 6'$ -GLb is Neu5Ac( $\alpha 2-3$ )Gal( $\beta 1-6$ )Gal( $\beta 1-4$ )Glc ( $\alpha 3$ Sia $\beta 6'$ -GLb).

The  $^1\text{H}$  NMR spectrum of di-sialylated  $\beta 6'$ -GL (Fig. S4D, Table S1, MALDI-TOF-MS:  $[\text{M-H}]^-$   $m/z$  1086.36) showed anomeric signals at  $\delta$  5.222 (**A $\alpha$**  H-1),  $\delta$  4.656 (**A $\beta$**  H-1),  $\delta$  4.514 (**C** H-1), and  $\delta$  4.545 (**B** H-1). The Neu5Ac H-3a and H-3e signals at  $\delta$  1.812 and  $\delta$  2.752, respectively, with twice the intensity compared with  $\alpha 3$ Sia $\beta 6'$ -GLa and  $\alpha 3$ Sia $\beta 6'$ -GLb, confirmed the presence of two Neu5Ac( $\alpha 2-3$ ) residues (1). Using two-dimensional NMR spectroscopy, as carried out for the mono-sialylated  $\beta 6'$ -GL components, all  $^1\text{H}$  and  $^{13}\text{C}$  chemical shifts were determined (Table S1). The  $\delta$ -value pattern of residue **A**, both in the  $\alpha$ - and  $\beta$ -configuration, matches that of  $\beta 6'$ -GL, indicating a 4-substituted reducing Glc residue. Residue **B** showed a  $\delta$ -value pattern comparable with that of residue **B** in  $\alpha 3$ Sia $\beta 6'$ -GLa, with evidence for both O-3 (**B** H-3,  $\delta$  4.126; **B** C-3,  $\delta$  76.3) and O-6 (**B** H-6a,  $\delta$  4.044; **B** C-6,  $\delta$  70.1) substitution of the Gal( $\beta 1-4$ ) residue (3). Residue **C** showed a  $\delta$ -value pattern comparable with that of residue **C** in  $\alpha 3$ Sia $\beta 6'$ -GLb, showing evidence for O-3 substitution (**C** H-3,  $\delta$  4.093; **C** C-3,  $\delta$  76.5) of the terminal Gal residue (3). The ROESY spectrum showed correlations between **B** H-1 and **A** H-4 and between **C** H-1 and **B** H-6a,6b, in agreement

with the **C1-6B1-4A** sequence. Summarizing the NMR and MS data, the structure of di-sialylated  $\beta$ 6'-GL is Neu5Ac( $\alpha$ 2-3)Gal( $\beta$ 1-6)[Neu5Ac( $\alpha$ 2-3)]Gal( $\beta$ 1-4)Glc ( $\alpha$ 3Sia<sub>2</sub> $\beta$ 6'-GL).

## References

1. **Vliegthart JFG, Kamerling JP.** 2007. <sup>1</sup>H NMR Structural-reporter-group concepts in carbohydrate analysis, p. 133-191. *In* Kamerling JP, Boons GJ, Lee YC, Suzuki A, Taniguchi N, Voragen AGJ (ed), *Comprehensive Glycoscience – From Chemistry to Systems Biology*, vol. 2. Elsevier, Amsterdam, The Netherlands.
2. **Fukuda K, Yamamoto A, Ganzorig K, Khuukhenbaatar J, Senda A, Saito T, Urashima T.** 2010. Chemical characterization of the oligosaccharides in Bactrian camel (*Camelus bactrianus*) milk and colostrum. *J. Dairy Sci.* **93**:5572-5587.
3. **Bock K, Thøgersen H.** 1982. Nuclear magnetic resonance spectroscopy in the study of mono- and oligosaccharides. *Annu. Rep. NMR Spectrosc.* **13**:1-57.

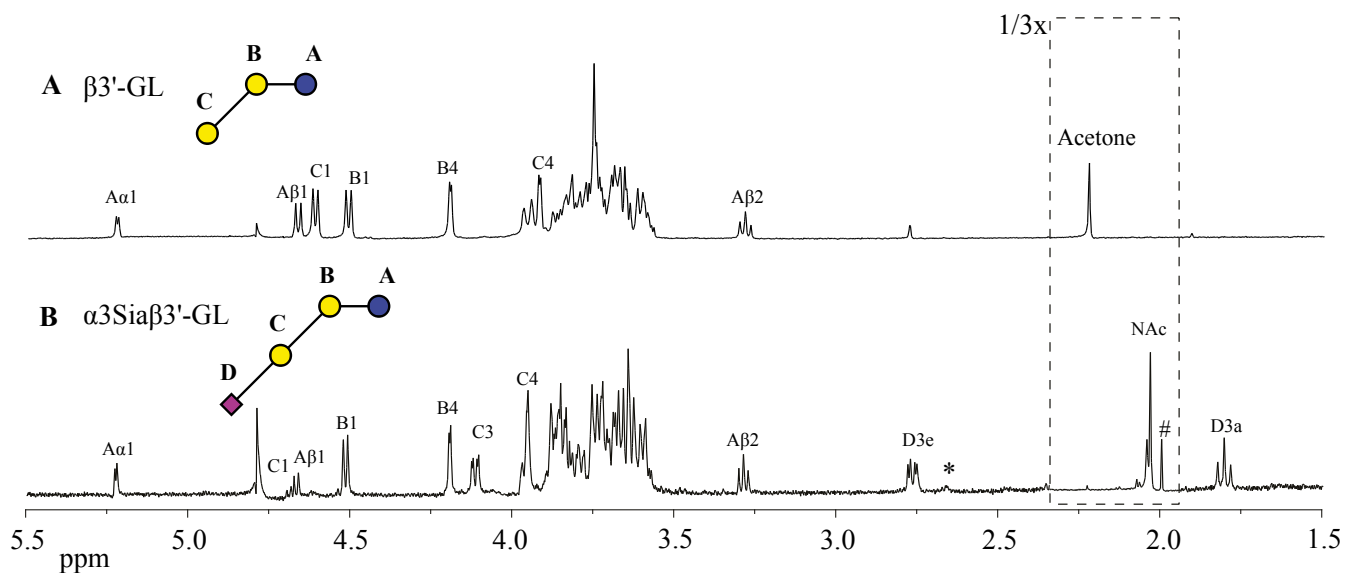

FIG. S2. One-dimensional 600-MHz <sup>1</sup>H NMR (D<sub>2</sub>O, 298 K) spectra of (A) Gal(β1-3)Gal(β1-4)Glc (β'3'-GL) and (B) Neu5Ac(α2-3)Gal(β1-3)Gal(β1-4)Glc (α3Siaβ3'-GL). Coding system: Glc, blue circle; Gal, yellow circle; Neu5Ac, pink square; \* and #, contaminants.

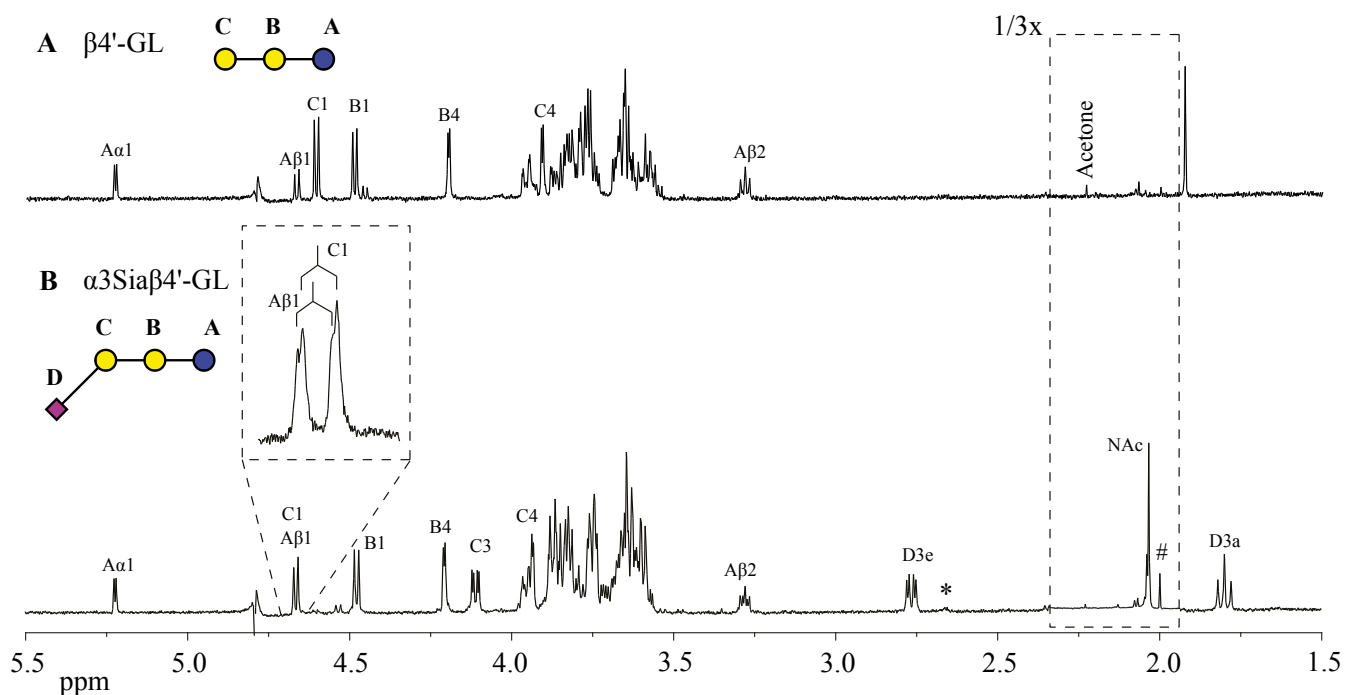

FIG. S3. One-dimensional 600-MHz <sup>1</sup>H NMR (D<sub>2</sub>O, 298 K) spectra of (A) Gal(β1-4)Gal(β1-4)Glc (β'4'-GL) and (B) Neu5Ac(α2-3)Gal(β1-4)Gal(β1-4)Glc (α3Siaβ4'-GL). Coding system, see Fig. S2; \* and #, contaminants.

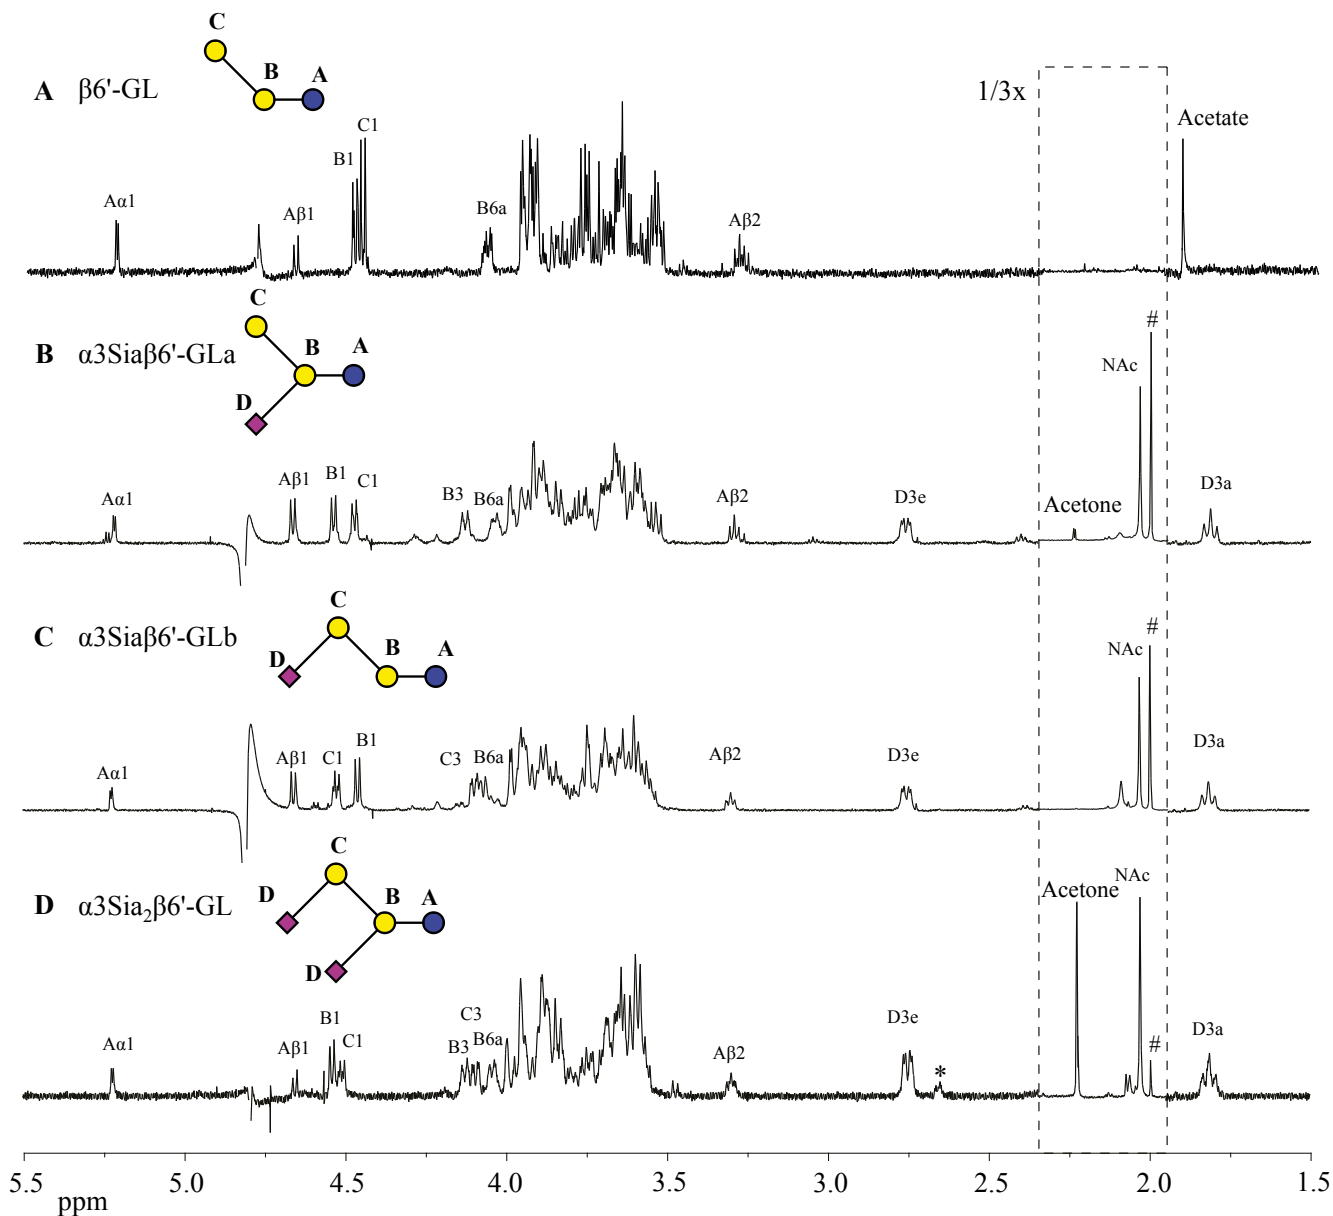

FIG. S4. One-dimensional 600-MHz <sup>1</sup>H NMR (D<sub>2</sub>O, 298 K) spectra of (A) Gal(β1-6)Gal(β1-4)Glc (β'6-GL), (B) Gal(β1-6)[Neu5Ac(α2-3)]Gal(β1-4)Glc (α3Siaβ6'-GLa), (C) Neu5Ac(α2-3)Gal(β1-6)Gal(β1-4)Glc (α3Siaβ6'-GLb), and (D) Neu5Ac(α2-3)Gal(β1-6)[Neu5Ac(α2-3)]Gal(β1-4)Glc (α3Sia<sub>2</sub>β6'-GL). Coding system, see Fig. S2; \* and #, contaminants.

TABLE S1. <sup>1</sup>H and <sup>13</sup>C chemical shifts<sup>a</sup> (D<sub>2</sub>O, 298 K) of β6'-GL, α3Siaβ6'-GLa, α3Siaβ6'-GLb, and α3Sia<sub>2</sub>β6'-GL.

|       | β6'-GL         |                 | α3Siaβ6'-GLa   |                 | α3Siaβ6'-GLb   |                 | α3Sia <sub>2</sub> β6'-GL |                 |
|-------|----------------|-----------------|----------------|-----------------|----------------|-----------------|---------------------------|-----------------|
|       | <sup>1</sup> H | <sup>13</sup> C | <sup>1</sup> H | <sup>13</sup> C | <sup>1</sup> H | <sup>13</sup> C | <sup>1</sup> H            | <sup>13</sup> C |
| Aα-1  | 5.223          | 93.1            | 5.217          | 92.6            | 5.228          | 92.7            | 5.222                     | 92.9            |
| Aα-2  | 3.57           | 72.1            | 3.59           | 72.1            | 3.60           | 72.0            | 3.60                      | 72.0            |
| Aα-3  | 3.83           | 72.8            | 3.84           | 72.6            | 3.83           | 72.6            | 3.83                      | 72.6            |
| Aα-4  | 3.63           | 80.2            | 3.64           | 80.0            | 3.62           | 80.2            | 3.65                      | 80.2            |
| Aα-5  | 3.94           | 71.1            | 3.94           | 71.0            | 3.96           | 71.0            | 3.95                      | 71.2            |
| Aα-6a | 3.88           | 61.1            | 3.88           | 60.9            | 3.88           | 61.0            | 3.88                      | 61.1            |
| Aα-6b | 3.84           |                 | 3.83           |                 | 3.82           |                 | 3.84                      |                 |
|       |                |                 |                |                 |                |                 |                           |                 |
| Aβ-1  | 4.667          | 96.9            | 4.662          | 96.6            | 4.660          | 96.7            | 4.656                     | 96.7            |
| Aβ-2  | 3.294          | 74.9            | 3.293          | 74.5            | 3.306          | 74.8            | 3.299                     | 74.8            |
| Aβ-3  | 3.63           | 75.8            | 3.67           | 76.0            | 3.64           | 75.8            | 3.65                      | 75.9            |
| Aβ-4  | 3.65           | 80.2            | 3.65           | 80.0            | 3.63           | 80.2            | 3.61                      | 80.2            |
| Aβ-5  | 3.60           | 75.9            | 3.60           | 75.4            | 3.60           | 75.2            | 3.60                      | 75.6            |
| Aβ-6a | 3.94           | 61.4            | 3.96           | 60.9            | 3.96           | 61.0            | 3.95                      | 61.1            |
| Aβ-6b | 3.80           |                 | 3.81           |                 | 3.81           |                 | 3.80                      |                 |
|       |                |                 |                |                 |                |                 |                           |                 |
| B-1   | 4.483          | 104.4           | 4.535          | 104.0           | 4.462          | 104.3           | 4.545                     | 103.9           |
| B-2   | 3.53           | 72.0            | 3.58           | 70.2            | 3.54           | 71.8            | 3.58                      | 70.2            |
| B-3   | 3.66           | 73.8            | 4.125          | 76.3            | 3.67           | 73.9            | 4.126                     | 76.3            |
| B-4   | 3.940          | 69.7            | 3.986          | 68.4            | 3.98           | 69.4            | 3.997                     | 68.5            |
| B-5   | 3.96           | 75.0            | 3.91           | 74.9            | 3.91           | 74.8            | 3.93                      | 74.8            |
| B-6a  | 4.079          | 70.3            | 4.037          | 70.1            | 4.073          | 69.8            | 4.044                     | 70.1            |
| B-6b  | 3.93           |                 | 3.92           |                 | 3.93           |                 | 3.90                      |                 |
|       |                |                 |                |                 |                |                 |                           |                 |
| C-1   | 4.460          | 104.4           | 4.470          | 104.4           | 4.528          | 104.1           | 4.514                     | 104.1           |
| C-2   | 3.54           | 72.0            | 3.53           | 72.8            | 3.57           | 70.2            | 3.56                      | 70.2            |
| C-3   | 3.67           | 73.8            | 3.66           | 73.8            | 4.100          | 76.8            | 4.093                     | 76.5            |
| C-4   | 3.974          | 69.7            | 3.914          | 69.4            | 3.95           | 68.5            | 3.942                     | 68.6            |
| C-5   | 3.68           | 76.3            | 3.68           | 75.9            | 3.69           | 76.1            | 3.68                      | 75.3            |
| C-6a  | 3.81           | 62.2            | 3.80           | 62.0            | 3.80           | 62.0            | 3.80                      | 62.0            |
| C-6b  | 3.76           |                 | 3.75           |                 | 3.75           |                 | 3.75                      |                 |
|       |                |                 |                |                 |                |                 |                           |                 |
| D-3a  |                |                 | 1.810          | 40.6            | 1.815          | 40.6            | 1.812                     | 40.5            |
| D-3e  |                |                 | 2.756          |                 | 2.755          |                 | 2.752                     |                 |
| D-4   |                |                 | 3.68           | 69.5            | 3.68           | 69.4            | 3.69                      | 69.5            |
| D-5   |                |                 | 3.83           | 52.8            | 3.84           | 52.6            | 3.83                      | 52.7            |
| D-6   |                |                 | 3.66           | 73.7            | 3.66           | 73.8            | 3.67                      | 73.8            |
| D-7   |                |                 | 3.60           | 69.2            | 3.60           | 69.2            | 3.61                      | 69.2            |
| D-8   |                |                 | 3.86           | 72.6            | 3.86           | 72.9            | 3.85                      | 72.6            |
| D-9a  |                |                 | 3.86           | 63.5            | 3.86           | 63.7            | 3.85                      | 63.5            |
| D-9b  |                |                 | 3.64           |                 | 3.64           |                 | 3.65                      |                 |
| D-NAc |                |                 | 2.030          | 23.1            | 2.031          | 23.0            | 2.028                     | 23.1            |

<sup>a</sup>In ppm relative to the signal of internal acetone ( $\delta^1\text{H}$  2.225,  $\delta^{13}\text{C}$  31.08). β6'-GL = Gal(β1-6)Gal(β1-4)Glc; α3Siaβ6'-GLa = Gal(β1-6)[Neu5Ac(α2-3)]Gal(β1-4)Glc; α3Siaβ6'-GLb = Neu5Ac(α2-3)Gal(β1-6)Gal(β1-4)Glc; α3Sia<sub>2</sub>β6'-GL = Neu5Ac(α2-3)Gal(β1-6)[Neu5Ac(α2-3)]Gal(β1-4)Glc.
